# Supplementary material for: Pluripotent stem cell-derived committed cardiac progenitors remuscularize damaged ischemic hearts and improve their function in pigs
Source: PubMed Central journal article supplement (PMC10219927; doi:10.1038/s41536-023-00302-6), 2023-05-26
Supplement: 41536_2023_302_MOESM1_ESM.pdf [file 41536_2023_302_MOESM1_ESM.pdf]

**Pluripotent stem cell-derived committed cardiac progenitors remuscularized  
and improve the heart function of ischemic pig hearts**

Lynn Yap<sup>1,2\*</sup>; Li Yen Chong<sup>1</sup>; Clarissa Tan<sup>1</sup>; Swarnaseetha Adusumalli<sup>1</sup>; Millie  
Seow<sup>1</sup>; Jing Guo<sup>1</sup>; Zuhua Cai<sup>1</sup>; Sze Jie Loo<sup>3</sup>; Eric Lim<sup>3</sup>; Ru San Tan<sup>3</sup>; Elina  
Grishina<sup>4</sup>; Poh Loong Soong<sup>4, 5</sup>; Narayan Lath<sup>3</sup>; Lei Ye<sup>6</sup>; Enrico Petretto<sup>1</sup>; Karl  
Tryggvason<sup>1, 7, 8\*</sup>

<sup>1</sup>Cardiovascular & Metabolic Disorders Program, Duke-NUS Medical School,  
National University of Singapore, Singapore 169857, Singapore

<sup>2</sup>Lee Kong Chian School of Medicine, Nanyang Technological University, 11  
Mandalay Road, Singapore 308232, Singapore

<sup>3</sup>National Heart Research Institute Singapore, National Heart Centre Singapore,  
Singapore, 169609, Singapore

<sup>4</sup>Ternion Biosciences, Singapore 574329, Singapore

<sup>5</sup>Cardiovascular Disease Translational Research Program, Yong Loo Lin School of  
Medicine, NUS, Singapore 169609, Singapore

<sup>6</sup>Department of Biomedical Engineering, University of Alabama, Birmingham, 35233

<sup>7</sup>Department of Medicine Duke University, Durham, North Carolina, 27710, USA

<sup>8</sup>Department of Medical Biochemistry and Biophysics, Karolinska Institute, 171 77  
Stockholm, Sweden

\* Co-corresponding Author

**Supplementary Files**

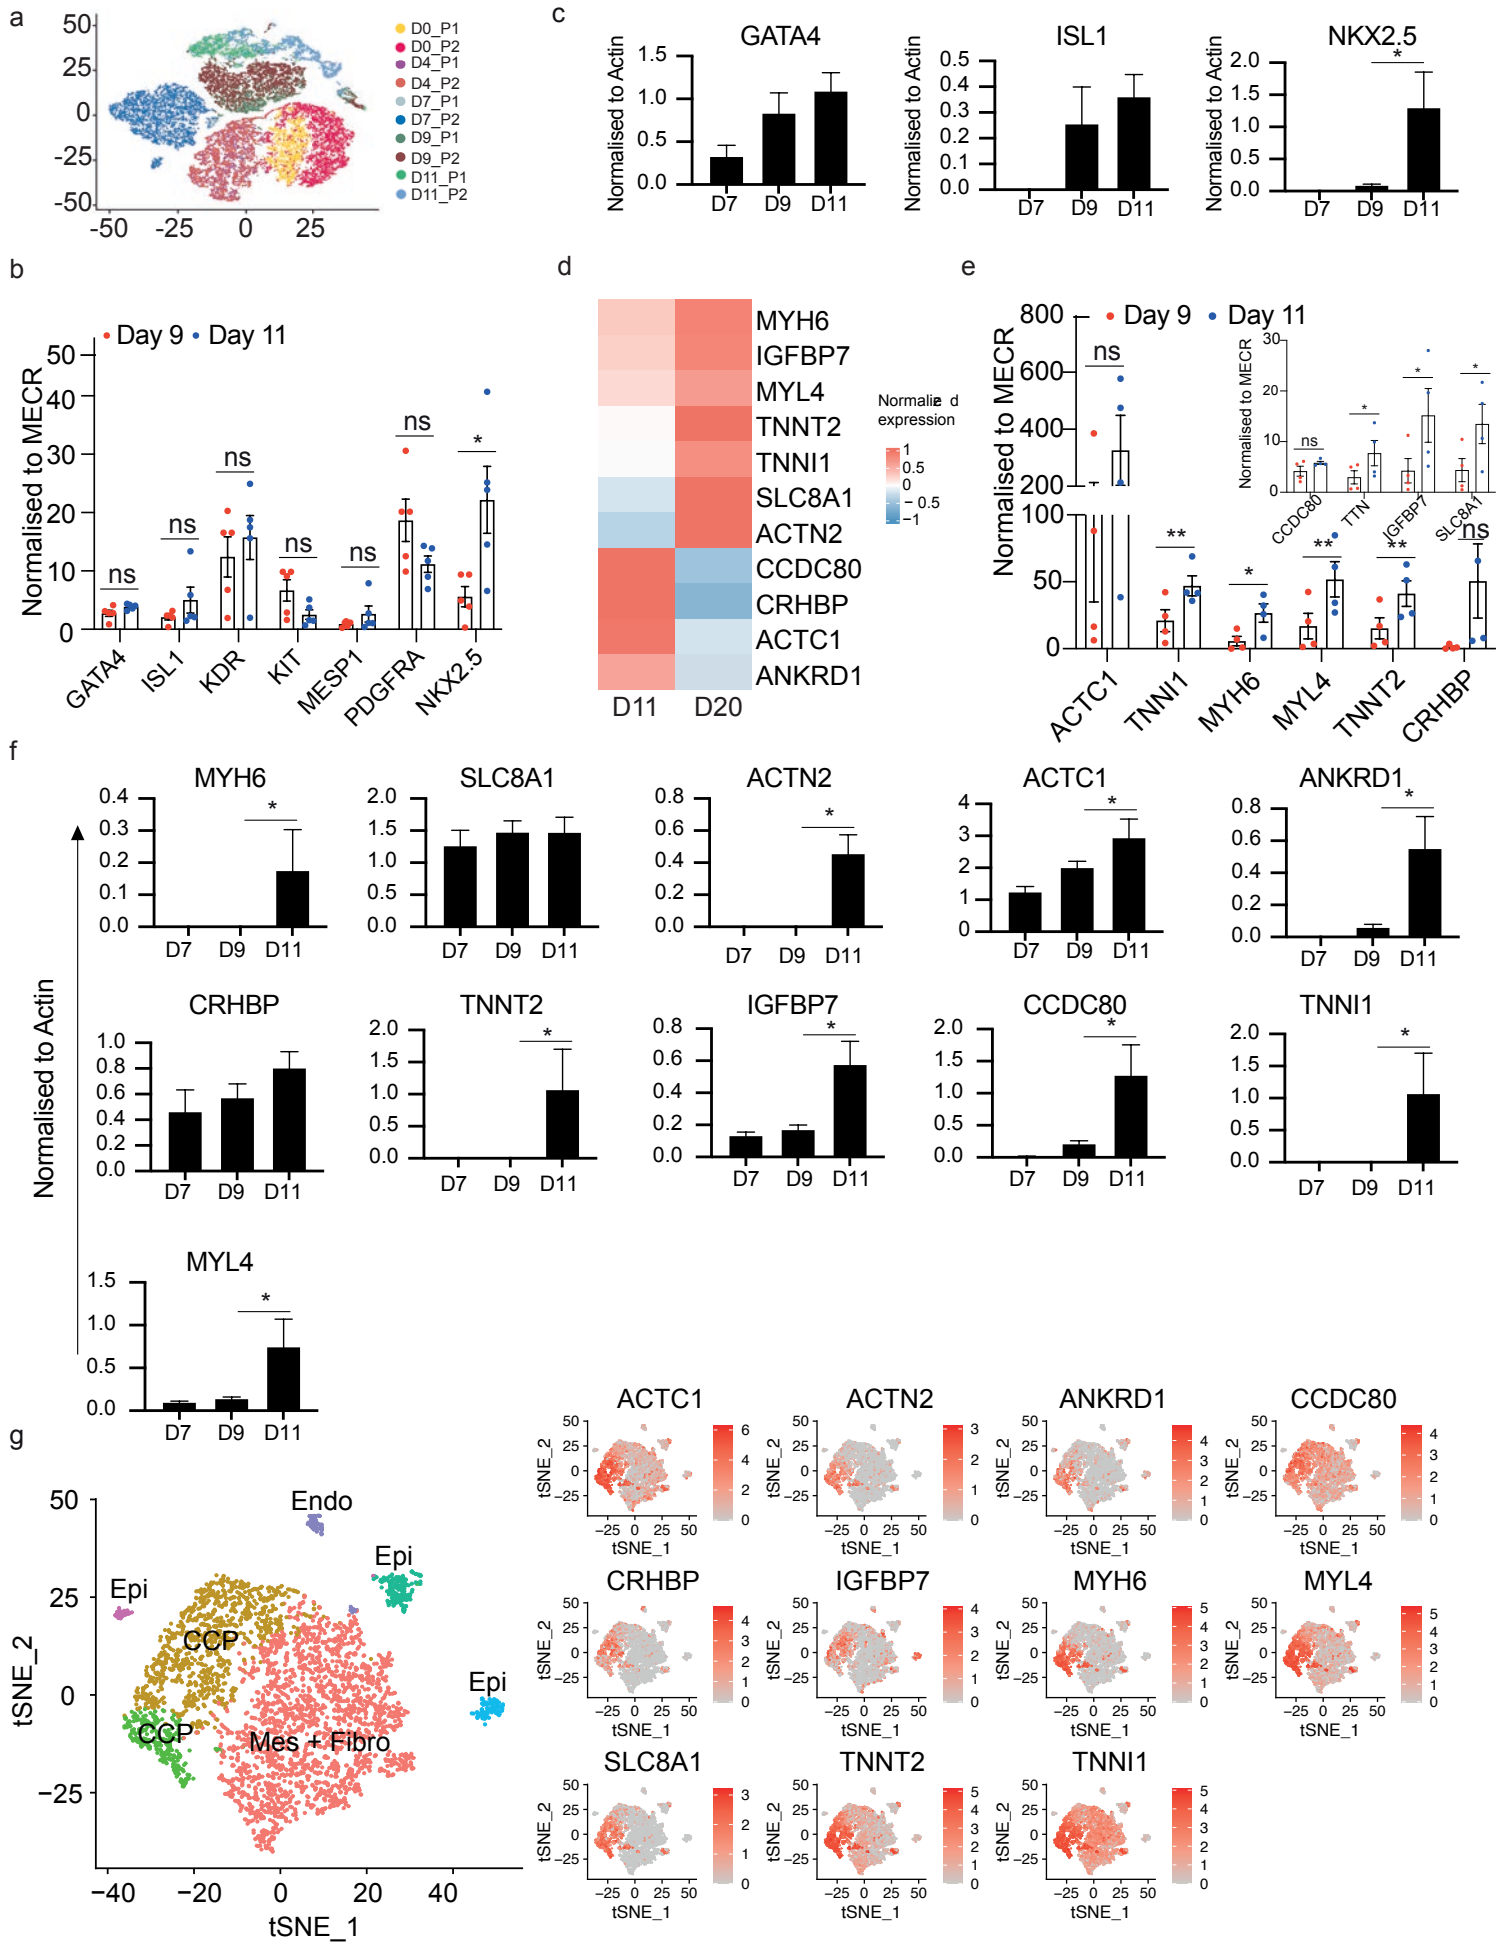

### **Supplementary Figure 1. Characterization of CCPs.**

(a) The tSNE plot of H1 single-cell RNAseq data from 2 biological replicates on days 0, 4, 7, 9, and 11. It shows the highly reproducible overlaps from both passages each day. (b) Quantitative PCR of canonical progenitor genes from differentiation days 9 and 11. The genes were normalized to the expression of the MECR gene. There are no significant differences between days 9 and 11 for all the genes ( $p$ -value  $> 0.05$ ) except NKX2.5 (\*  $p$ -value  $< 0.05$ ). Mean  $\pm$  SEM,  $n=6$  individual differentiation batches. (c) Densitometry analysis of immunoblots of canonical progenitors markers in Figure 1e.  $p$ -value  $< 0.05$ ,  $n = 5$ . (d) Heatmap of CCP genes on days 11 and 20. (e) Quantitative PCR results of day 11 CCP signature genes from differentiation days 9 and 11 (four biological replicates). The genes are normalized to MECR. Significant differences on day 11 are observed in all the genes ( $p$ -value  $< 0.05$ ) except for ACTC1 and CCDC80 (\*  $p$ -value  $< 0.05$ , \*\*  $p$ -value  $< 0.005$ ) when compared with day 9. Mean  $\pm$  SEM,  $n=6$  individual differentiation batches. (f) Densitometry analysis of immunoblots CCP signature genes in Figure 1i.  $p$ -value  $< 0.05$ ,  $n = 5$  (g) The tSNE plot of the scRNA-seq data displays the subpopulations of CCP, mesenchymal + fibroblasts (Mes + Fibro), epithelial (Epi), and endothelial (Endo) on day 11. Individual genes are plotted on the right.

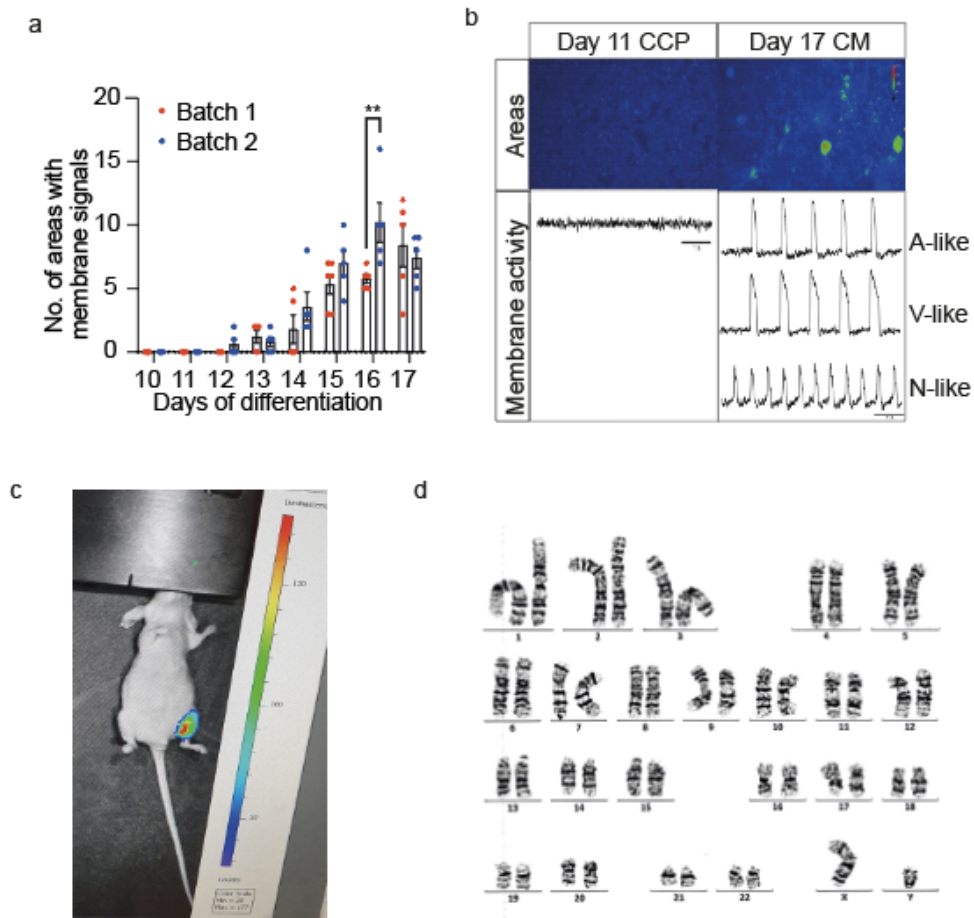

## Supplementary Figure 2. Characterization of CCPs

(a) Optical electrophysiology results showing the number of areas with membrane potential across days of differentiation from 2 batches of differentiation ( $p$ -value  $< 0.05$ ).

(b) Representative image of day 11 CCP and 17 days of differentiation with detectable membrane potential (green spots). Action potential traces at 11 days of differentiation showed the absence of signals while membrane activities of atrial-like (A), ventricular-like (V), and nodal-like (N) CM were observed on Day 17. (c) IVIS optical scan image of CCP-transplanted nude mice showing the location of luciferase-positive CCP after 8 weeks and the absence of abnormal tumor growth at the hindlimb. (d) A normal karyogram of luciferase-transduced H1 cells.



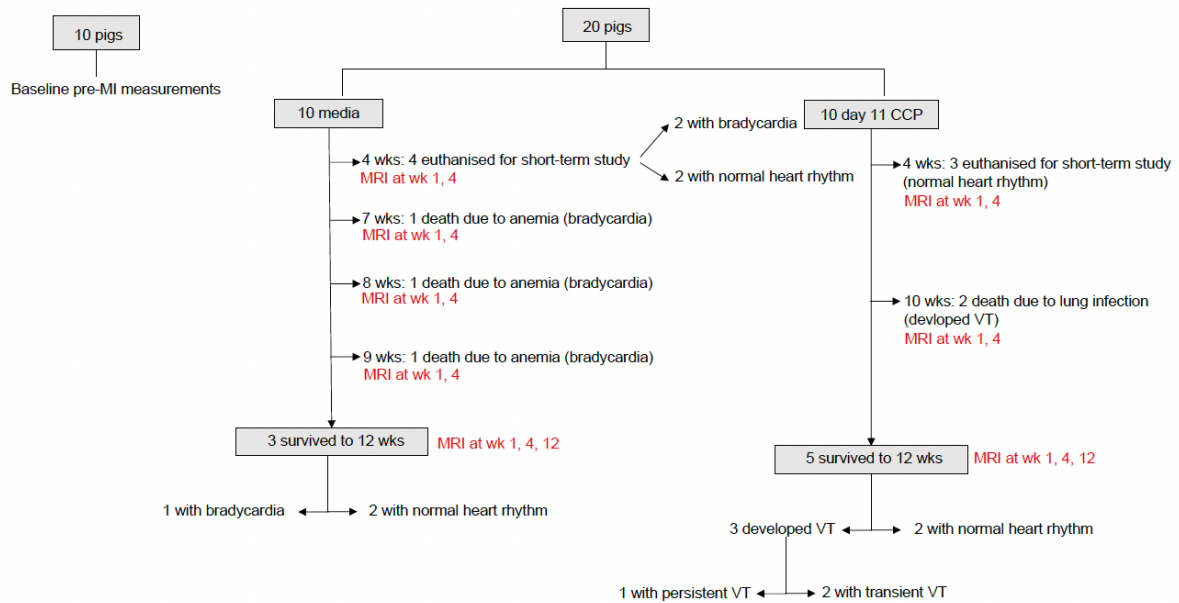

**Supplementary Figure 3. Flowchart to describe the overall experimental design of the study**

A total of 20 pigs were enrolled in the study. 10 pigs for media control and 10 pigs for CCP transplantation. An independent 10 pigs for pre-MI baseline measurements.



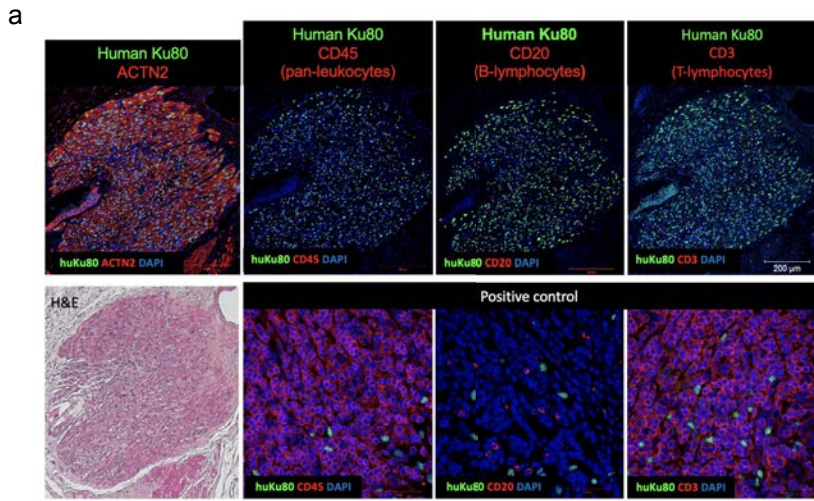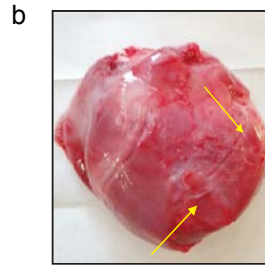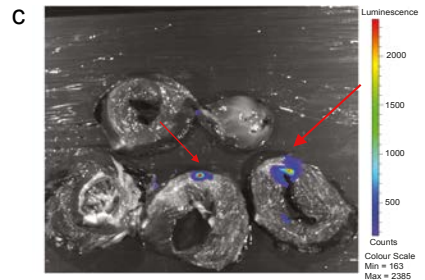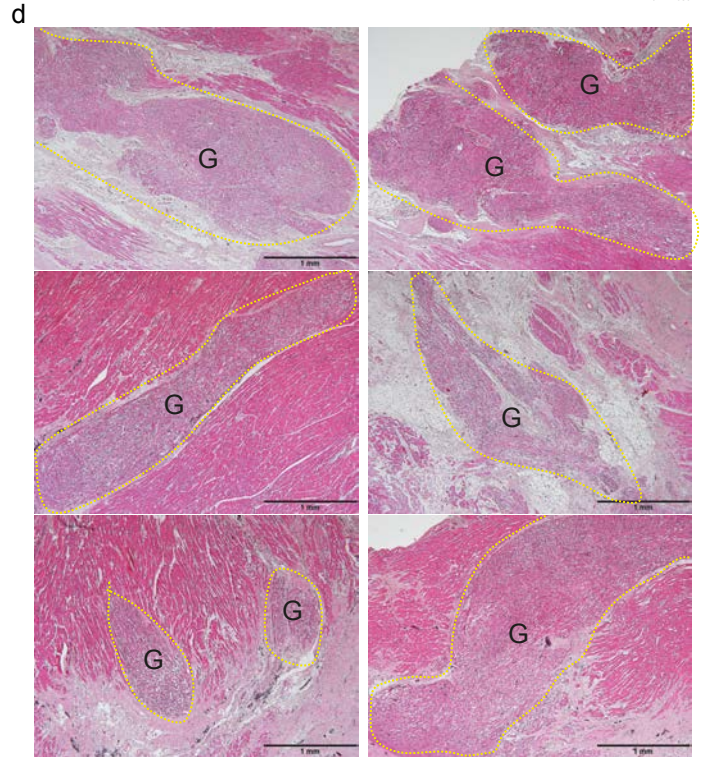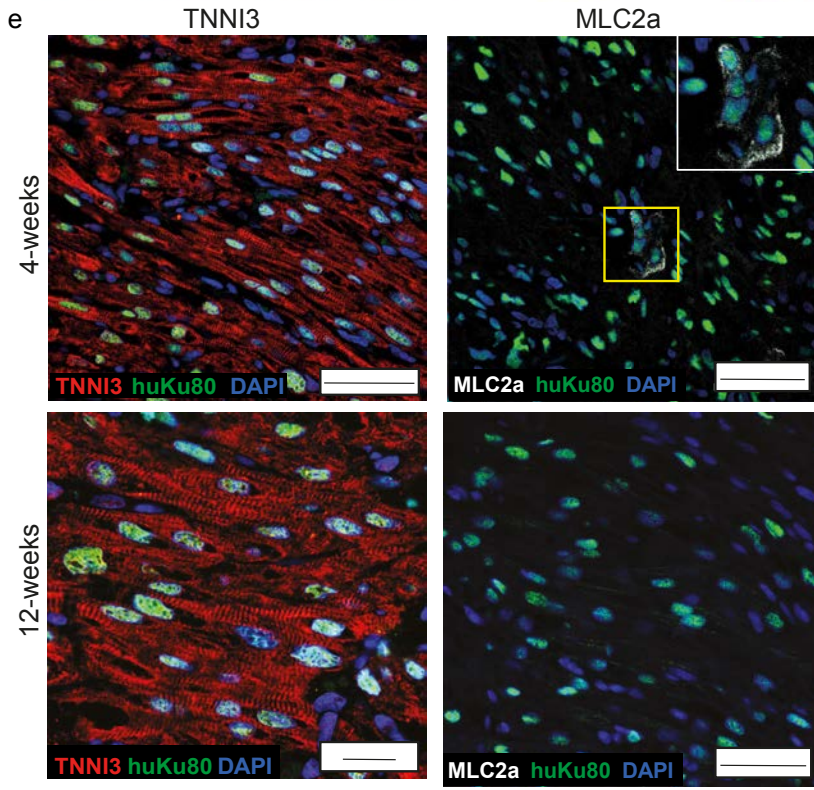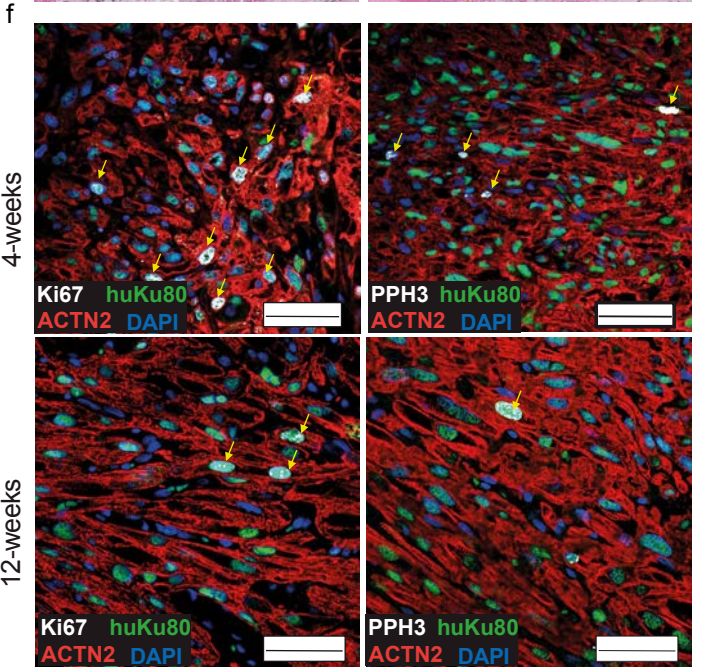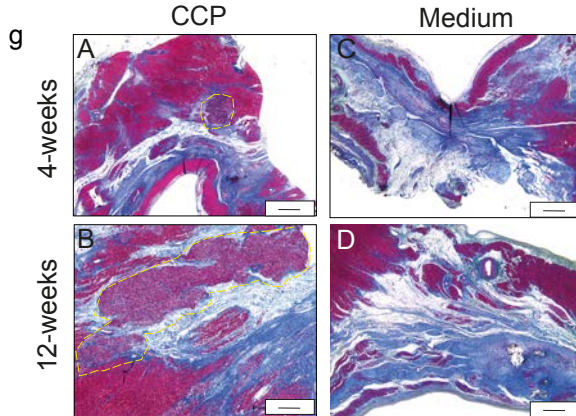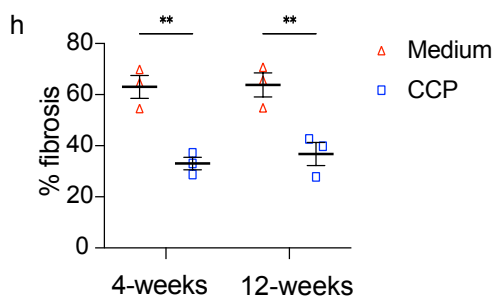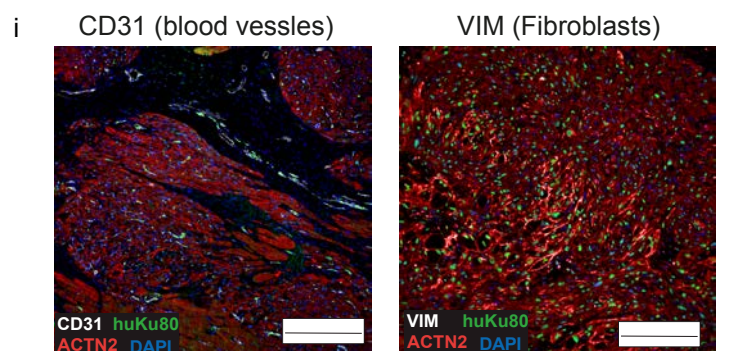



#### **Supplementary Figure 4. Characterization of human grafts at 4- and 12-weeks.**

(a) Top: Confocal image of human graft stained with huKu80 (green) and ACTN2 (red) indicating the presence of human cells in the graft. Confocal images of human grafts stained with immune cell markers in red CD45 (pan-leukocytes), CD20 (B-lymphocytes), and CD3 (T-lymphocytes), show the absence of these immune cells. Bottom: A representative H&E image of human graft in an infarcted area. Confocal images of tissues with immune cells as the positive control. Scale bar = 200  $\mu\text{m}$  (b) Whole heart image demonstrating the presence of the ligation suture (yellow arrows) at the LAD artery after 12 weeks post-transplantation confirming the permanent MI model. Scale bar = 1 mm (c) *In vivo* IVIS imaging of hearts after CCP transplantation shows the presence of live human cells (bioluminescence signal, red arrows) at 12 weeks post-transplantation. (d) H&E staining on 12 weeks human grafts. Human grafts (indicated as g) are demarcated in dotted yellow lines. Grafts sizes range from 1 mm to 10 mm. (e) Confocal images of human grafts stained with (left) TNNI3 (red), huKu80 (green), and (right) atrial-like CM marker, MLC2a (white), huKu80 (green) at 4 and 12 weeks post-transplantation, Scale bar = 50  $\mu\text{m}$ . No atrial-like CMs were present in the infarcted area. (f) Confocal images of tissue stained with proliferation markers, Ki67 or PPH3 (white), huKu80 (green), ACTN2 (red) at 4- and 12 weeks. Scale bar = 50  $\mu\text{m}$  (g) Bright-field images of CCP transplanted tissues stained with Masson trichrome at 4 and 12 weeks post-transplantation. Scale bar = 1 mm (h) Graph showing the quantification of the Masson trichrome staining in medium and CCP-transplanted heart at 4 and 12 weeks. \*\* p-value < 0.01 (i) Immunocytochemistry of human grafts with human nuclei-specific Ku80 in green, blood vessels-specific CD31 or fibroblast-specific vimentin (VIM) in white, cardiac-related gene (ACTN2) in red and nuclei in blue. Scale bar = 50  $\mu\text{m}$

a

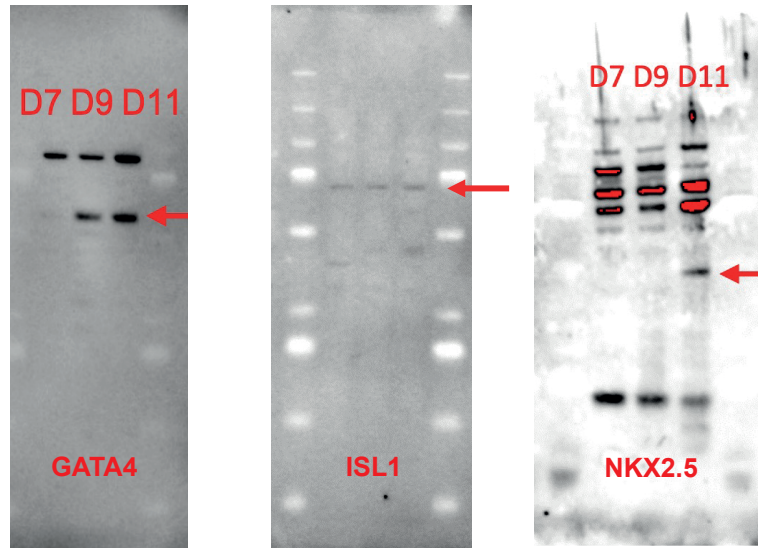

b

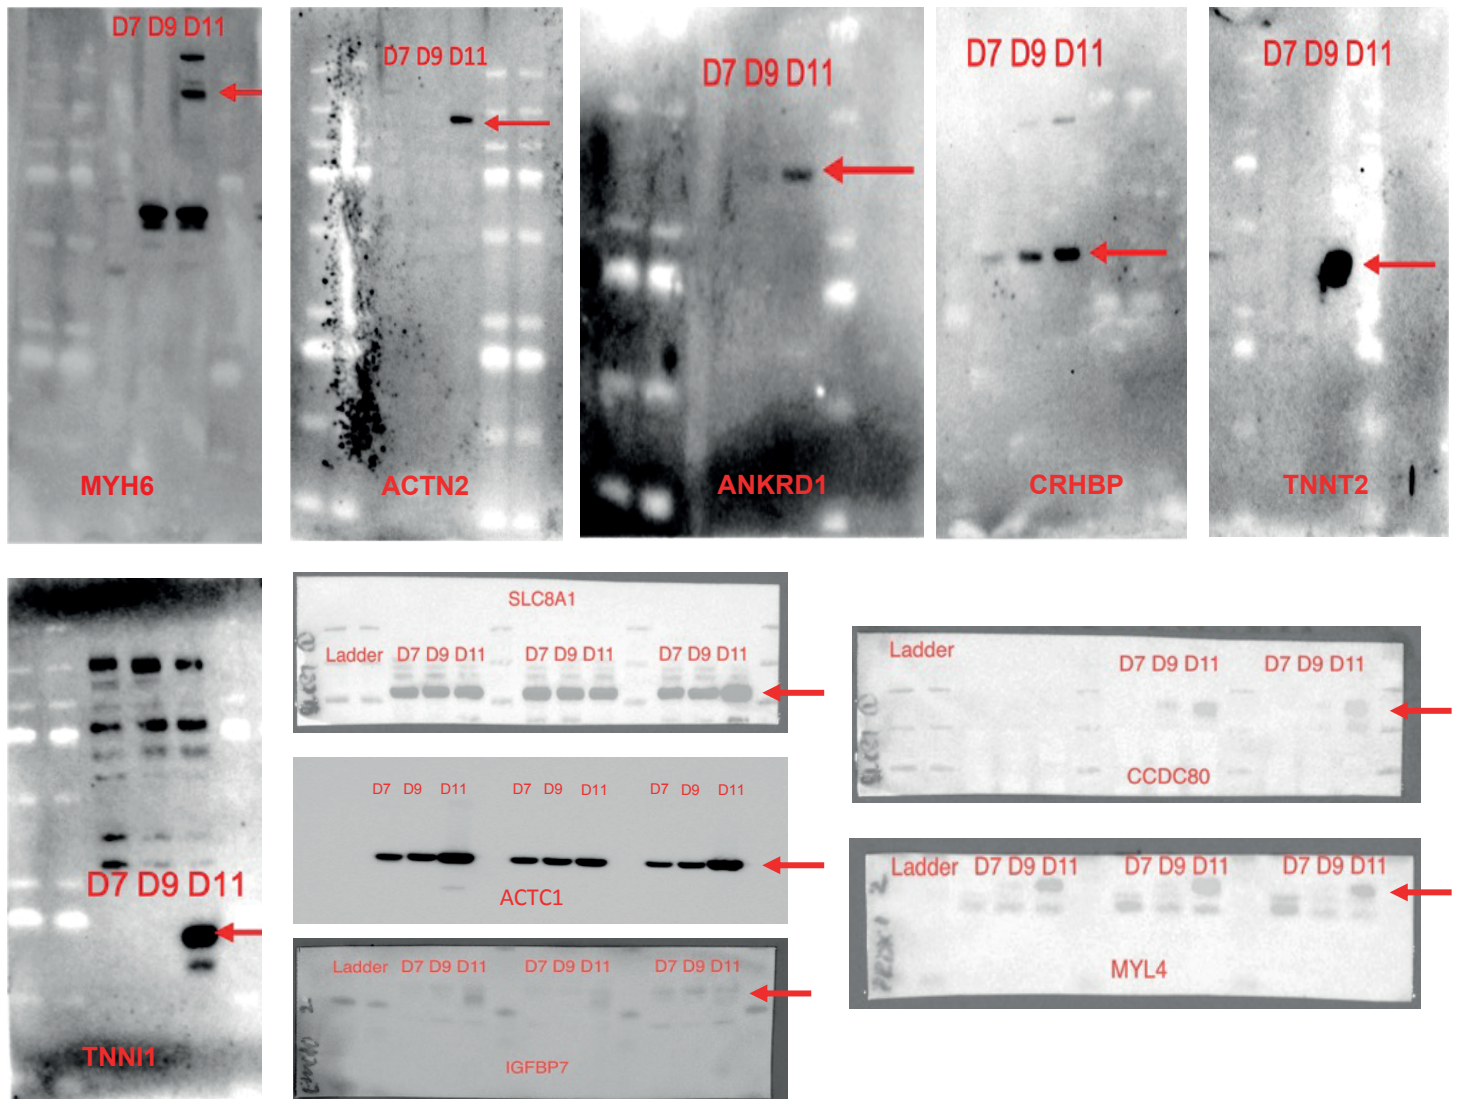

**Supplementary Figure 5. Raw western blot images of marker genes**

(a) Western blot images of GATA4, ISL1 and NKX2.5 (corresponding to Figure 1d)

(b) Western blot images of CCP signature genes including MYH6, SLC8A1, ACTN2, ACTC1, ANKRD1, CRHBP, TNNT2, IGFBP7, CCDC80, TNNI1 and MYL4.

(corresponding to Figure 1h)

**Supplementary Video 1:** Video of medium control pig with activation mapping showing scarring in the myocardium with red color

**Supplementary Video 2:** Video of electromechanical mappings in CCP transplanted pig without VT.

**Supplementary Video 3:** Video of electromechanical mappings in CCP transplanted pig with VT.

**Supplementary Table 1.**

Bulk RNA sequencing fold change values between days 9 and 11 for the canonical and unique CCP signature genes.

Positive FC D9 > D11, Negative FC D11 > D9

|        | <b>Row.names</b> | <b>baseMean</b> | <b>log2FoldChange</b> | <b>lfcSE</b> | <b>stat</b> | <b>pvalue</b> | <b>padj</b> | <b>significance</b> |
|--------|------------------|-----------------|-----------------------|--------------|-------------|---------------|-------------|---------------------|
| GATA4  | ENSG00000136574  | 2389.01786      | -0.092155466          | 0.33591788   | -0.2616549  | 0.79358755    | 1           | NS                  |
| ISL1   | ENSG00000016082  | 476.805485      | 1.341505415           | 0.40814848   | 3.21672573  | 0.00129662    | 0.0583098   | NS                  |
| KDR    | ENSG00000128052  | 10333.1799      | 0.429613486           | 0.58713695   | 0.81272567  | 0.41637536    | 1           | NS                  |
| KIT    | ENSG00000157404  | 2062.1677       | 1.009000883           | 0.44049829   | 2.27789727  | 0.0227327     | 0.49207767  | NS                  |
| MESP1  | ENSG00000166823  | 36.6626216      | 1.463464972           | 0.57394073   | 2.54122217  | 0.01104657    | 0.30333907  | NS                  |
| NKX2-5 | ENSG00000183072  | 1237.02953      | -3.655018313          | 0.49177469   | -7.4007428  | 1.35E-13      | 1.22E-10    | S                   |
| PDGFRA | ENSG00000134853  | 9888.13345      | 1.438401415           | 0.39158058   | 3.68803668  | 0.00022599    | 0.01358984  | S                   |

|        | <b>Row.names</b> | <b>baseMean</b> | <b>log2FoldChange</b> | <b>lfcSE</b> | <b>stat</b> | <b>pvalue</b> | <b>padj</b> | <b>significance</b> |
|--------|------------------|-----------------|-----------------------|--------------|-------------|---------------|-------------|---------------------|
| MYH6   | ENSG00000197616  | 80644.3594      | -7.366190764          | 0.5943595    | -12.232554  | 2.08E-34      | 3.16E-30    | S                   |
| SLC8A1 | ENSG00000183023  | 6487.12829      | -5.262693064          | 0.55881536   | -9.4151244  | 4.73E-21      | 1.44E-17    | S                   |
| ACTN2  | ENSG00000077522  | 4878.39653      | -4.559286453          | 0.64020591   | -7.14508    | 8.99E-13      | 6.65E-10    | S                   |
| ACTC1  | ENSG00000159251  | 19930.1004      | -3.610740635          | 0.49608066   | -7.2682712  | 3.64E-13      | 2.96E-10    | S                   |
| ANKRD1 | ENSG00000148677  | 6054.57918      | -1.51859583           | 0.66290716   | -2.2311825  | 0.02566904    | 0.5322672   | NS                  |
| CRHBP  | ENSG00000145708  | 834.902819      | -6.123338416          | 0.49297893   | -12.285963  | 1.08E-34      | 2.63E-30    | S                   |
| TNNT2  | ENSG00000118194  | 10767.1328      | -4.25514647           | 0.56113053   | -7.6264618  | 2.41E-14      | 2.45E-11    | S                   |
| IGFBP7 | ENSG00000163453  | 835.199649      | -3.421883784          | 0.51601852   | -6.6929085  | 2.19E-11      | 1.05E-08    | S                   |
| CCDC80 | ENSG00000091986  | 4297.85928      | -3.527509781          | 0.48020768   | -7.2968299  | 2.95E-13      | 2.57E-10    | S                   |
| TNNI1  | ENSG00000159173  | 6524.01948      | -3.10845505           | 0.50272012   | -6.1185238  | 9.44E-10      | 3.66E-07    | S                   |
| MYL4   | ENSG00000198336  | 6611.08959      | -2.51896335           | 0.37625544   | -6.6899396  | 2.23E-11      | 1.05E-08    | S                   |

Bulk RNA sequencing fold change values between days 11 and 20 for the canonical and unique CCP signature genes.

Positive FC D9 > D11, Negative FC D11 > D9

|        | Row.names       | baseMean   | log2FoldChange | lfcSE      | stat       | pvalue     | padj       | significance |
|--------|-----------------|------------|----------------|------------|------------|------------|------------|--------------|
| MYH6   | ENSG00000197616 | 80644.3594 | 0.394958942    | 0.59378669 | 0.74039518 | 0.45906024 | 0.71268542 | NS           |
| SLC8A1 | ENSG00000183023 | 6487.12829 | 1.098161082    | 0.55667964 | 1.96789194 | 0.04908047 | 0.20149689 | S            |
| ACTN2  | ENSG00000077522 | 4878.39653 | 1.504611393    | 0.63833236 | 2.3734839  | 0.01762116 | 0.10467334 | S            |
| ACTC1  | ENSG00000159251 | 19930.1004 | -1.254048375   | 0.49598309 | -2.5053235 | 0.01223394 | 0.08277057 | S            |
| ANKRD1 | ENSG00000148677 | 6054.57918 | -0.820213048   | 0.66287653 | -1.200178  | 0.23007023 | 0.49608664 | NS           |
| CRHBP  | ENSG00000145708 | 834.902819 | -4.697886262   | 0.48399967 | -9.5674603 | 1.10E-21   | 1.48E-18   | S            |
| TNNT2  | ENSG00000118194 | 10767.1328 | 0.534492526    | 0.5606345  | 0.97621133 | 0.32895975 | 0.60220516 | NS           |
| IGFBP7 | ENSG00000163453 | 835.199649 | 0.25878806     | 0.51262256 | 0.51917518 | 0.60363859 | 0.8130151  | NS           |
| CCDC80 | ENSG00000091986 | 4297.85928 | -2.217962122   | 0.47992091 | -4.6113509 | 4.00E-06   | 0.00016555 | S            |
| TNNI1  | ENSG00000159173 | 6524.01948 | 0.508218711    | 0.50230891 | 1.04345645 | 0.29673694 | 0.57099093 | NS           |
| MYL4   | ENSG00000198336 | 6611.08959 | 0.012536032    | 0.37596654 | 0.01951657 | 0.98442902 | 0.99458326 | NS           |



**Supplementary Table 2.** Primer sequences

| Num. | Primer ID | Primer sequence (5' → 3')      |
|------|-----------|--------------------------------|
| 1    | GATA4-F   | GTT GCA CAG ATA GTG ACC CGT    |
| 2    | GATA4-R   | CGA CAC AAT CTC GAT ATG        |
| 3    | ISL1-F    | GAG GGT TTC TCC GGA TTT GG     |
| 4    | ISL1-R    | TCC CAT CC TAA CAA AGC ATG T   |
| 5    | KDR-F     | GGC CCA ATA ATC AGA GTG GCA    |
| 6    | KDR-R     | CCA GTG TCA TTT CCG ATC ACT TT |
| 7    | KIT-F     | CGT TCT GCT CCT ACT GCT TCG    |
| 8    | KIT-R     | CCC ACG CGG ACT ATT AAG TCT    |
| 9    | MESP1-F   | TGT ACG CAG AAA CAG CAT CC     |
| 10   | MESP1-R   | TTG TCC CCT CCA CTC TTC AG     |
| 11   | PDGFRA-F  | TGG CAG TAC CCC ATG TCT GAA    |
| 12   | PDGFRA-R  | CCA AGA CCG TCA CAA AAA GGC    |
| 13   | NKX2.5-F  | ACC CTG AGT CCC CTG GAT TT     |
| 14   | NKX2.5-R  | TCA CTC ATT GCA CGC TGC AT     |
| 15   | ACTC1-F   | TCC CAT CGA GCA TGG TAT CAT    |
| 16   | ACTC1-R   | GGT ACG GCC AGA AGC ATA CA     |
| 17   | TNNI-F    | CCG GAA GTC GAG AGA AAA CCC    |
| 18   | TNNI-R    | TCA ATG TCG TAT CGC TCC TCA    |
| 19   | MYH6-F    | GCC CTT TGA CAT TGG CAC TG     |
| 20   | MYH6-R    | GGT TTC AGC AAT GAC CTT GCC    |
| 21   | MYL4-F    | ACT GCC GAC CAG ATT GAA GAG    |
| 22   | MYL4-R    | CTT GTT GCG GGA AAT GTG CTG    |
| 23   | TNNT2-F   | GGA GGA GTC CAA ACC AAA GCC    |
| 24   | TNNT2-R   | TCA AAG TCC ACT CTC TCT CCA TC |
| 25   | CRHBP-F   | ATG TCG CCC AAC TTC AAA CTT    |
| 26   | CRHBP-R   | GCA GGA AAG GAT CGT AGT CCG    |
| 27   | CCDC80-F  | GCT GGT GAT CTC TGC TCC TAA C  |
| 28   | CCDC80-R  | CTT CCT CTC CAA CGC CTA AAA GC |
| 29   | TTN-F     | CTG CTG ACT ACA CCT TTG TGG C  |
| 30   | TTN-R     | GCT CGC TTC TTC TCC AGT ACC T  |
| 31   | IGFBP7-F  | GCG AGC AAG GTC CTT CCA TA     |
| 32   | IGFBP7-R  | GGG ATT CCG ATG ACC TCA CA     |
| 33   | SLC8A1-F  | ACA ACA TGC GGC GAT TAA GTC    |
| 34   | SLC8A1-R  | GCT CTA GCA ATT TTG TCC CCA    |
| 35   | MECR-F    | CTG GCG GCC CCT ATC AAT C      |
| 36   | MECR-R    | AAC ACC TTC GTT CCC TCC AAC    |

**Supplementary Table 3. Summary of MRI measurements**

| ID   | Cause of death | 1-week           |             |            |          |                  |                               |                              |                  | 4-week              |            |            |          |                  |                               |                              |                  | 12-week          |            |            |          |                  |                               |                              |                  |
|------|----------------|------------------|-------------|------------|----------|------------------|-------------------------------|------------------------------|------------------|---------------------|------------|------------|----------|------------------|-------------------------------|------------------------------|------------------|------------------|------------|------------|----------|------------------|-------------------------------|------------------------------|------------------|
|      |                | Heart rate (bpm) | LVED V (ml) | LVESV (ml) | LVEF (%) | Infarct size (%) | Diastolic wall thickness (mm) | Systolic wall thickness (mm) | Wall motion (mm) | Heart rate (bpm)    | LVEDV (ml) | LVESV (ml) | LVEF (%) | Infarct size (%) | Diastolic wall thickness (mm) | Systolic wall thickness (mm) | Wall motion (mm) | Heart rate (bpm) | LVEDV (ml) | LVESV (ml) | LVEF (%) | Infarct size (%) | Diastolic wall thickness (mm) | Systolic wall thickness (mm) | Wall motion (mm) |
| 2515 |                | 104              | 44.68       | 28.7       | 35.77    | 15.1             | 5.2                           | 6                            | 5                | 119                 | 55.88      | 37.06      | 33.69    | 14.9             | 4.9                           | 4.6                          | 2.7              |                  |            |            |          |                  |                               |                              |                  |
| 2545 |                | 130.7            | 43.4        | 30.48      | 29.76    | 14.2             | 4.5                           | 4.5                          | 0.2              | 99.2                | 55.78      | 33.7       | 39.59    | 10.5             | 4.9                           | 4.2                          | 0.5              |                  |            |            |          |                  |                               |                              |                  |
| 2548 |                | 153.1            | 34.89       | 21.01      | 39.78    | 16.3             | 5.3                           | 5                            | 1.3              | 115                 | 61.87      | 37.86      | 38.81    | 14.5             | 4.4                           | 4.4                          | 0.7              |                  |            |            |          |                  |                               |                              |                  |
| 2666 |                | 50               | 35.22       | 22.48      | 36.17    | 15.1             | 4.1                           | 5.5                          | 2.2              | 69                  | 33.29      | 20.97      | 37       | 13.5             | 4.4                           | 4.9                          | 1.9              |                  |            |            |          |                  |                               |                              |                  |
| 2668 | Anemia         | 106              | 32.88       | 20.42      | 37.89    | 12.8             | 5.3                           | 6                            | 2.6              | 76.2                | 35.52      | 23.01      | 35.22    | 13.3             | 5.2                           | 5.4                          | 2.2              |                  |            |            |          |                  |                               |                              |                  |
| 2665 | Anemia         | 102              | 30.59       | 21.02      | 31.29    | 14.5             | 5.9                           | 6.1                          | 2.6              | 80                  | 46.77      | 30.41      | 34.99    | 11.6             | 5.9                           | 6.5                          | 1.7              |                  |            |            |          |                  |                               |                              |                  |
| 2585 | Anemia         | 132.8            | 26.58       | 17.23      | 35.19    | 10               | 4.3                           | 5.1                          | 3.4              | 93.7                | 65.03      | 40.51      | 37.7     | 11.9             | 5.4                           | 7.9                          | 2.9              |                  |            |            |          |                  |                               |                              |                  |
| 2517 |                | 118.6            | 37.5        | 22.41      | 40.25    | 14.3             | 4.6                           | 4.1                          | 3.7              | 135                 | 51.43      | 32.68      | 36.44    | 13.9             | 4.7                           | 3.8                          | -0.4             | 81.2             | 57.8       | 37.56      | 35.02    | 15.9             | 6.4                           | 5.6                          | 0.3              |
| 2572 |                | 121              | 41.59       | 26         | 37.5     | 11.8             | 6                             | 6.3                          | 2.1              | 115.4               | 50.13      | 30.89      | 38.39    | 13.7             | 5                             | 6                            | 1.7              | 97               | 41.99      | 25.85      | 38.44    | 12.7             | 4.5                           | 4.2                          | -0.1             |
| 2583 |                | 125              | 29.24       | 18.39      | 37.12    | 16.4             | 4.5                           | 5.2                          | 3                | 95.2                | 62.95      | 39.86      | 36.68    | 17.5             | 5.1                           | 4.8                          | 1.5              | 80.9             | 88.93      | 53.98      | 39.3     | 13.6             | 6.4                           | 6.4                          | 2.9              |
| 2469 |                | 115.3            | 27.13       | 16.35      | 39.76    | 12.7             | 5.7                           | 6.7                          | 3.6              | 111                 | 31.04      | 16.51      | 46.82    | 12.5             | 5.3                           | 6.8                          | 2.4              |                  |            |            |          |                  |                               |                              |                  |
| 2520 |                | 109.2            | 44.35       | 26.12      | 41.11    | 12               | 5                             | 6.1                          | 3.1              | 100                 | 52.51      | 28.18      | 46.34    | 12.3             | 6.7                           | 7.5                          | 2.5              |                  |            |            |          |                  |                               |                              |                  |
| 2584 |                | 148              | 47.44       | 28.45      | 40.02    | 12.8             | 4.9                           | 6.3                          | 3.8              | 102.7               | 64.46      | 38.59      | 40.13    | 9.1              | 5.6                           | 5                            | 4.5              |                  |            |            |          |                  |                               |                              |                  |
| 2578 | lung infection | 110.5            | 45.67       | 25.94      | 43.2     | 16.6             | 5.8                           | 5.7                          | 4.4              | 83.6                | 66.78      | 40.04      | 40.03    | 13.1             | 5.2                           | 6.4                          | 5.8              |                  |            |            |          |                  |                               |                              |                  |
| 2576 | lung infection | 120              | 46.33       | 26.86      | 42.01    | 7.1              | 6                             | 6.7                          | 5.1              | 78.4                | 76.5       | 48.91      | 36.07    | 9.1              | 5.7                           | 7.1                          | 6.4              |                  |            |            |          |                  |                               |                              |                  |
| 2498 |                | 124              | 31.96       | 19.35      | 39.45    | 14.3             | Heart rate too fast           |                              |                  | Heart rate too fast |            |            |          |                  |                               |                              |                  | 85.1             | 65.47      | 37.98      | 41.98    | 8.2              | 5.8                           | 6.7                          | 5.3              |
| 2519 |                | 111              | 40.81       | 24.04      | 41.08    | 9                | 5.2                           | 7.2                          | 3.1              | 141.7               | 49.21      | 26.29      | 46.58    | 10.2             | 5.3                           | 6.4                          | 2.4              | 88               | 91.46      | 48.2       | 47.3     | 10.3             | 7                             | 15.4                         | 7.8              |
| 2577 |                | 75               | 44.16       | 25.64      | 41.93    | 11.2             | 5.9                           | 8.2                          | 1                | 113.1               | 41.27      | 22.23      | 46.14    | 11.7             | 6.1                           | 6.7                          | -2               | 120.5            | 56.21      | 30.06      | 46.53    | 11.1             | 6.6                           | 8.6                          | 2.8              |
| 2573 |                | 138              | 37.29       | 21.73      | 41.72    | 11.2             | 4.9                           | 5.7                          | 2.7              | 76.8                | 51.64      | 30.47      | 41       | 7.2              | 5                             | 7.2                          | 3.6              | 74.3             | 72.91      | 41.29      | 43.37    | 7                | 6.4                           | 7.1                          | 4.1              |
| 2673 |                | 116              | 27.97       | 15.98      | 42.86    | 9.6              | 6.3                           | 6.2                          | 3.7              | 77                  | 50.03      | 24.98      | 50.06    | 5.5              | 5.8                           | 5.5                          | 2.8              | 102              | 57.69      | 31.6       | 45.23    | 4.4              | 7.4                           |                              | 6                |

|      | Pre-MI              |               |               |          |                                     |                     |
|------|---------------------|---------------|---------------|----------|-------------------------------------|---------------------|
|      | Heart rate<br>(bpm) | LVEDV<br>(ml) | LVESV<br>(ml) | LVEF (%) | Diastolic wall<br>thickness<br>(mm) | Wall motion<br>(mm) |
| 1000 | 138.6               | 29.19         | 13.81         | 52.69    | 5.5                                 | 5                   |
| 1001 | 127.9               | 34.79         | 15.63         | 55.07    | 4.8                                 | 4.6                 |
| 1002 | 154.4               | 32.82         | 15.78         | 51.93    | 5                                   | 5.6                 |
| 1003 | 175.4               | 20.65         | 9.38          | 54.61    | 4.8                                 | 4.5                 |
| 1004 | 96.2                | 59.56         | 30.24         | 49.23    | 5                                   | 7.2                 |
| 1005 | 111                 | 42.85         | 20.94         | 51.14    | 4.8                                 | 5.6                 |
| 1006 | 116.6               | 38.12         | 17.22         | 54.84    | 4.6                                 | 7                   |
| 1007 | 112.6               | 49.6          | 23.45         | 52.73    | 4.9                                 | 6.3                 |
| 1008 | 116.3               | 45.79         | 21.95         | 52.07    | 4.8                                 | 5                   |
| 1009 | 75.2                | 56.63         | 27.58         | 51.29    | 4.2                                 | 5.1                 |

**Supplementary Table 4.** Summary of in vivo electrophysiology measurements

|                                                            | 2667 (Sham)  |             |              | 2583 (media, 2 wks) |             |             | 2585 (Media, 2 wks) |             |             | 2515 (Media, 4 wks) |             |              |
|------------------------------------------------------------|--------------|-------------|--------------|---------------------|-------------|-------------|---------------------|-------------|-------------|---------------------|-------------|--------------|
|                                                            | unipolar     | bipolar     | LLS          | unipolar            | bipolar     | LLS         | unipolar            | bipolar     | LLS         | unipolar            | bipolar     | LLS          |
| Apex                                                       | 10           | 2.7         | 13.6         | 6.3                 | 3.2         | 8           | 14.9                | 6           | 10.8        | 5                   | 2.4         | 10.9         |
| Midanterior                                                | 9.4          | 3.4         | 14.2         | 6.1                 | 2           | 6.4         | 11.9                | 2.5         | 4.6         | 4.7                 | 0.6         | 7.4          |
| Anterobasal                                                | 12           | 3.8         | 13.4         | 6.9                 | 4.2         | 5.8         | 12.5                | 3           | -8.6        | 11.3                | 5           | 12.6         |
| Midlateral                                                 | 10.3         | 3.4         | 15.7         | 7.7                 | 3.3         | 2.1         | 9.9                 | 2.4         | 8.3         | 10.2                | 3.8         | 8.7          |
| Basolateral                                                | 11.6         | 5.9         | 12.6         | 6.7                 | 2.8         | 13.9        | 12.8                | 4.2         | 5.8         | 15.3                | 8.2         | 17.2         |
| Midposterior                                               | 9.2          | 2.7         | 12.4         | 9.4                 | 3.7         | 2.3         | 19.6                | 3.3         | 7.8         | 12.3                | 3.6         | 21.1         |
| Posterobasal                                               | 14.4         | 3.8         | 8.6          | 9.1                 | 3.7         | 24          | 9.4                 | 2.8         | 10.4        | 9.3                 | 4.3         | 16.7         |
| Midseptal                                                  | 12.9         | 1.8         | 12           | 12.4                | 2.8         | 8.8         | 13.9                | 4           | 13.6        | 13.3                | 3           | 13.5         |
| Basoseptal                                                 | 5.5          | 1.5         | 9.3          | 9.4                 | 5           | -0.5        | 4.6                 | 1.8         | 7.9         | 8.4                 | 2.1         | 8.7          |
| Mean                                                       | <u>10.59</u> | <u>3.22</u> | <u>12.42</u> | <u>8.22</u>         | <u>3.41</u> | <u>7.87</u> | <u>12.17</u>        | <u>3.33</u> | <u>6.73</u> | <u>9.98</u>         | <u>3.67</u> | <u>12.98</u> |
|                                                            |              |             |              |                     |             |             |                     |             |             |                     |             |              |
| Scar segments (bulleye) unipolar Voltage <5mV, bipV <0,5mV | 0            | 0           |              | 0                   | 0           |             | 1                   | 0           |             | 2                   | 0           |              |
| %scar unipV/ bipV (9 segments)                             | 0.00         | 0.00        |              | 0.00                | 0.00        |             | 11.11               | 0.00        |             | 22.22               | 0.00        |              |
|                                                            |              |             |              |                     |             |             |                     |             |             |                     |             |              |
| Segments with normal movement (LLS>6%)                     |              |             | 9            |                     |             | 5           |                     |             | 6           |                     |             | 9            |
| Hypokinetic segments (2-6% LLS)                            |              |             | 0            |                     |             | 3           |                     |             | 2           |                     |             | 0            |
| Dyskinetic segments(- %)                                   |              |             | 0            |                     |             | 1           |                     |             | 1           |                     |             | 0            |
| Akinetic segments (0-2% LLS)                               |              |             | 0            |                     |             | 0           |                     |             | 0           |                     |             | 0            |

|                                                            | 2573 (CCP, 2 wks) |             |             | 2577 (CCP, 2 wks) |             |             | 2584 (CCP, 2 wks) |             |             | 2519 (CCP, 4 wks) |             |              | 2519 (CCP, 10 wks) |             |              |
|------------------------------------------------------------|-------------------|-------------|-------------|-------------------|-------------|-------------|-------------------|-------------|-------------|-------------------|-------------|--------------|--------------------|-------------|--------------|
|                                                            | unipolar          | bipolar     | LLS         | unipolar          | bipolar     | LLS         | unipolar          | bipolar     | LLS         | unipolar          | bipolar     | LLS          | unipolar           | bipolar     | LLS          |
| Apex                                                       | 21.6              | 6.4         | 7.6         | 13.6              | 4.8         | 2.1         | 10.2              | 4.3         | 9.9         | 7.6               | 4.1         | 12.7         | 7.3                | 5.4         | 18.8         |
| Midanterior                                                | 12.5              | 3.4         | 1.8         | 14.7              | 3.7         | 8.9         | 7.1               | 2.3         | 6.6         | 9.7               | 5.7         | 9.6          | 13.5               | 3.6         | 20.2         |
| Anterobasal                                                | 11.1              | 4.3         | 7.6         | 13.7              | 3.5         | 8.5         | 6.8               | 2.2         | 2.3         | 12.2              | 5.7         | 10.4         | 9.5                | 2.8         | 18.3         |
| Midlateral                                                 | 8.8               | 5           | 10.9        | 10.4              | 2.9         | 5.4         | 5.1               | 3.4         | 5.6         | 11.7              | 4.6         | 11.6         | 5.4                | 1.6         | 6.3          |
| Basolateral                                                | 16.5              | 4.1         | 12.3        | 8.9               | 3.3         | 22.9        | 8.5               | 5.3         | 9.5         | 8.4               | 5.1         | 17.2         | 7.3                | 1.8         | 17.3         |
| Midposterior                                               | 17.4              | 6.4         | 14.7        | 16.7              | 3.4         | 8.3         | 13.8              | 5.8         | 8.5         | 11.9              | 4.4         | 6.4          | 18.8               | 6.7         | 7.3          |
| Posterobasal                                               | 10                | 3.1         | 14.8        | 9                 | 3.6         | 9.8         | 6.8               | 4           | 11.6        | 11.2              | 5.2         | 11.1         | 11.6               | 3.7         | 16.8         |
| Midseptal                                                  | 14.3              | 5.5         | 11.4        | 14.9              | 5.7         | -1.9        | 11.3              | 3.7         | 11.7        | 12.1              | 4.1         | 12.8         | 19.6               | 4           | 14.6         |
| Basoseptal                                                 | 15.4              | 4.1         | 7.7         | 11.5              | 3.2         | 11.4        | 6.1               | 2.8         | 5.3         | 7.9               | 3.7         | 9            | 12.6               | 4.1         | 9.4          |
| Mean                                                       | <u>14.18</u>      | <u>4.70</u> | <u>9.87</u> | <u>12.60</u>      | <u>3.79</u> | <u>8.38</u> | <u>8.41</u>       | <u>3.76</u> | <u>7.89</u> | <u>10.30</u>      | <u>4.73</u> | <u>11.20</u> | <u>11.73</u>       | <u>3.74</u> | <u>14.33</u> |
|                                                            |                   |             |             |                   |             |             |                   |             |             |                   |             |              |                    |             |              |
|                                                            |                   |             |             |                   |             |             |                   |             |             |                   |             |              |                    |             |              |
| Scar segments (bulleye) unipolar Voltage <5mV, bipV <0,5mV | <u>0</u>          | <u>0</u>    |             | <u>0</u>          | <u>0</u>    |             | <u>0</u>          | <u>0</u>    |             | <u>0</u>          | <u>0</u>    |              | <u>0</u>           | <u>0</u>    |              |
| %scar unipV/ bipV (9 segments)                             | <u>0.00</u>       | <u>0.00</u> |             | <u>0.00</u>       | <u>0.00</u> |             | <u>0.00</u>       | <u>0.00</u> |             | <u>0.00</u>       | <u>0.00</u> |              | <u>0.00</u>        | <u>0.00</u> |              |
|                                                            |                   |             |             |                   |             |             |                   |             |             |                   |             |              |                    |             |              |
| Segments with normal movement (LLS>6%)                     |                   |             | 8           |                   |             | 6           |                   |             | 6           |                   |             | 9            |                    |             | 9            |
| Hypokinetic segments (2-6% LLS)                            |                   |             | 0           |                   |             | 2           |                   |             | 3           |                   |             | 0            |                    |             | 0            |
| Dyskinetic segments(- %)                                   |                   |             | 0           |                   |             | 1           |                   |             | 0           |                   |             | 0            |                    |             | 0            |
| Akinetic segments (0-2% LLS)                               |                   |             | 1           |                   |             | 0           |                   |             | 0           |                   |             | 0            |                    |             | 0            |
